# Supplementary material
Source: Springer Nature journal article supplement (https://www.springermedizin.de/resource/supplementary/12885_2011_2819_MOESM1_ESM.pdf/9461986)
Supplement: MOESM1 [file 9461986]

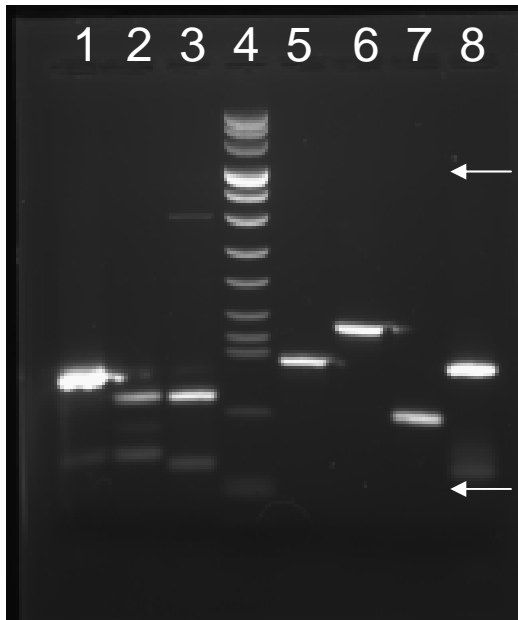

(bp)

1114  
900  
692  
501  
489  
404  
320  
242  
190  
147  
124  
110

67

19/37

1. L-FABP (93 bp)
2. I-FABP (78 bp)
3. H-FABP (77 bp)
4. DNA Molecular Weight Marker VIII (Roche)
5. A-FABP (105 bp)
6. E-FABP (138 bp)
7. IL-FABP (68 bp)
8. B-FABP (104 bp)

} Primer
